# Supplementary material
Source: publisher site journal article supplement (https://www.dovepress.com/article/316816)
Supplement: Supplementary file 1 [file get_supplementary_file.php]

Table 1 The primers used in qRT-PCR.

| Gene | Primer forward (5' to 3') | Primer reverse (5' to 3') |
| --- | --- | --- |
| CD40 | ACTGAAACGGAATGCCTTCCT | CCTCACTCGTACAGTGCCA |
| CD80 | AAACTCGCATCTACTGGCAAA | GGTTCTTGTACTCGGGCCATA |
| CD86 | CTGCTCATCTATACACGGTTACC | GGAAACGTCGTACAGTTCTGTG |
| Cxcl16 | CCCGCCATCGGTTCAGTTC | CCCCGAGTAAGCATGTCCAC |
| Cxcl9 | CCAGTAGTGAGAAAGGGTCGC | AGGGCTTGGGGCAAATTGTT |
| CD163 | TTTGTCAACTTGAGTCCCTTCAC | TCCCGCTACACTTGTTTTCAC |
| CD200R | TGGTTGTTGAAAGTCAATGGCT | CTCAGATGCCTTCACCTTGTTT |
| CD206 | TCCGGGTGCTGTTCTCCTA | CCAGTCTGTTTTTGATGGCACT |
| Tnfrsf1b | CGGGCCAACATGCAAAAGTC | CAGATGCGGTTCTGTTCCC |
| Parp9 | TGCAATGGTCGTGAACAACCT | CAACTGGGACCGTTGAAACTG |
| Tgfβ | GGCCAGATCCTGTCCAAGC | GTGGGTTTCCACCATTAGCAC |
| IL10 | GACTTTAAGGGTTACCTGGGTTG | TCACATGCGCCTTGATGTCTG |
| Ccl18 | GTTGACTATTCTGAAACCAGCCCCC | GGTCGCTGATGTATTTCTGGACCC |
| CD36 | GGCTGTGACCGGAACTGTG | AGGTCTCCAACTGGCATTAGAA |
| TNF-α | GATCCCTGACATCTGGAATCTG | GAAACATCTGGAGAGAGGAAGG |
| IL-1β | CAAAGGCGGCCAGGATATAA | CTAGGGATTGAGTCCACATTCAG |
| GAPDH | GGTGTGAACCATGAGAAGTATGA | GAGTCCTTCCACGATACCAAAG |


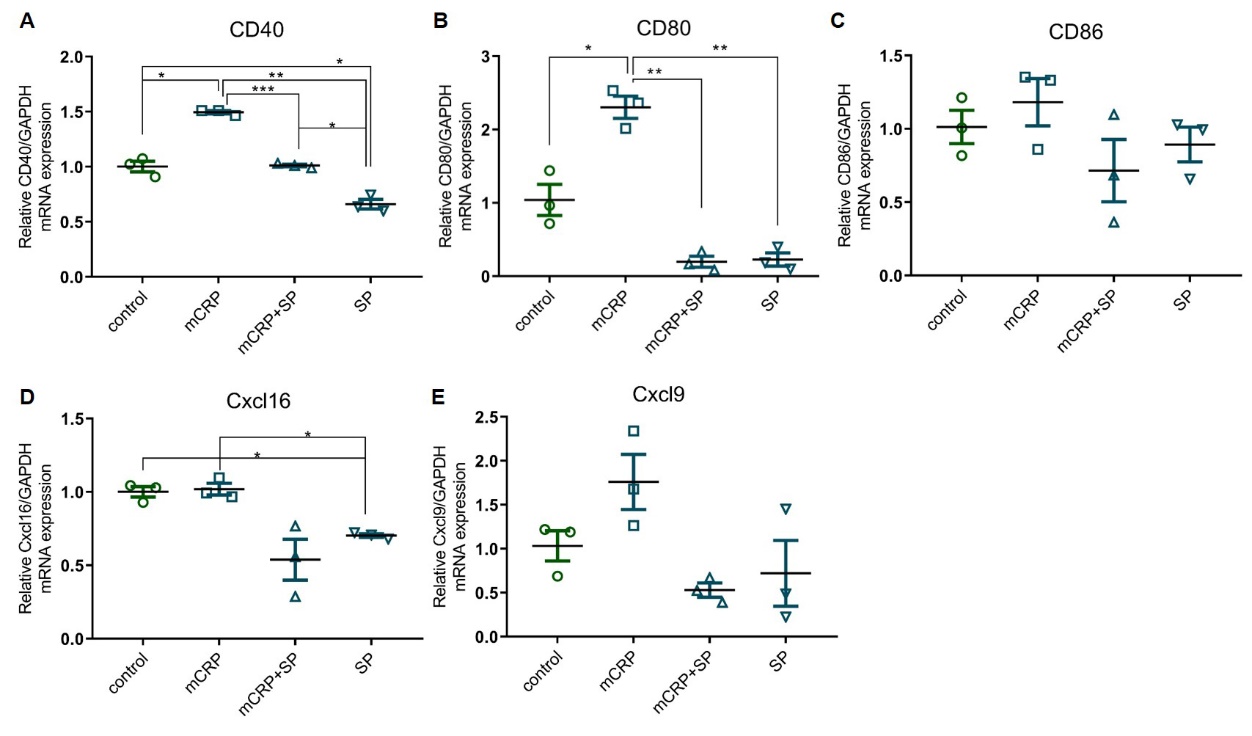


**Supplementary Figure 1** Effects of mCRP and the JNK inhibitor (SP600125) on the mRNA levels of the panel of pro-inflammatory biomarkers on macrophages measured by qRT-PCR.(**A**)CD40, (**B**)CD80，(**C**)CD86, (**D**)Cxcl16, (**E**)Cxcl9 . THP-1 cells were incubated with mCRP (50μg/ml) for 8 h and/or co-cultured with the JNK inhibitor (SP600125, 10μM). Data are represented as mean ± SD, **p*<0.05; ***p*<0.01; ****p*<0.001


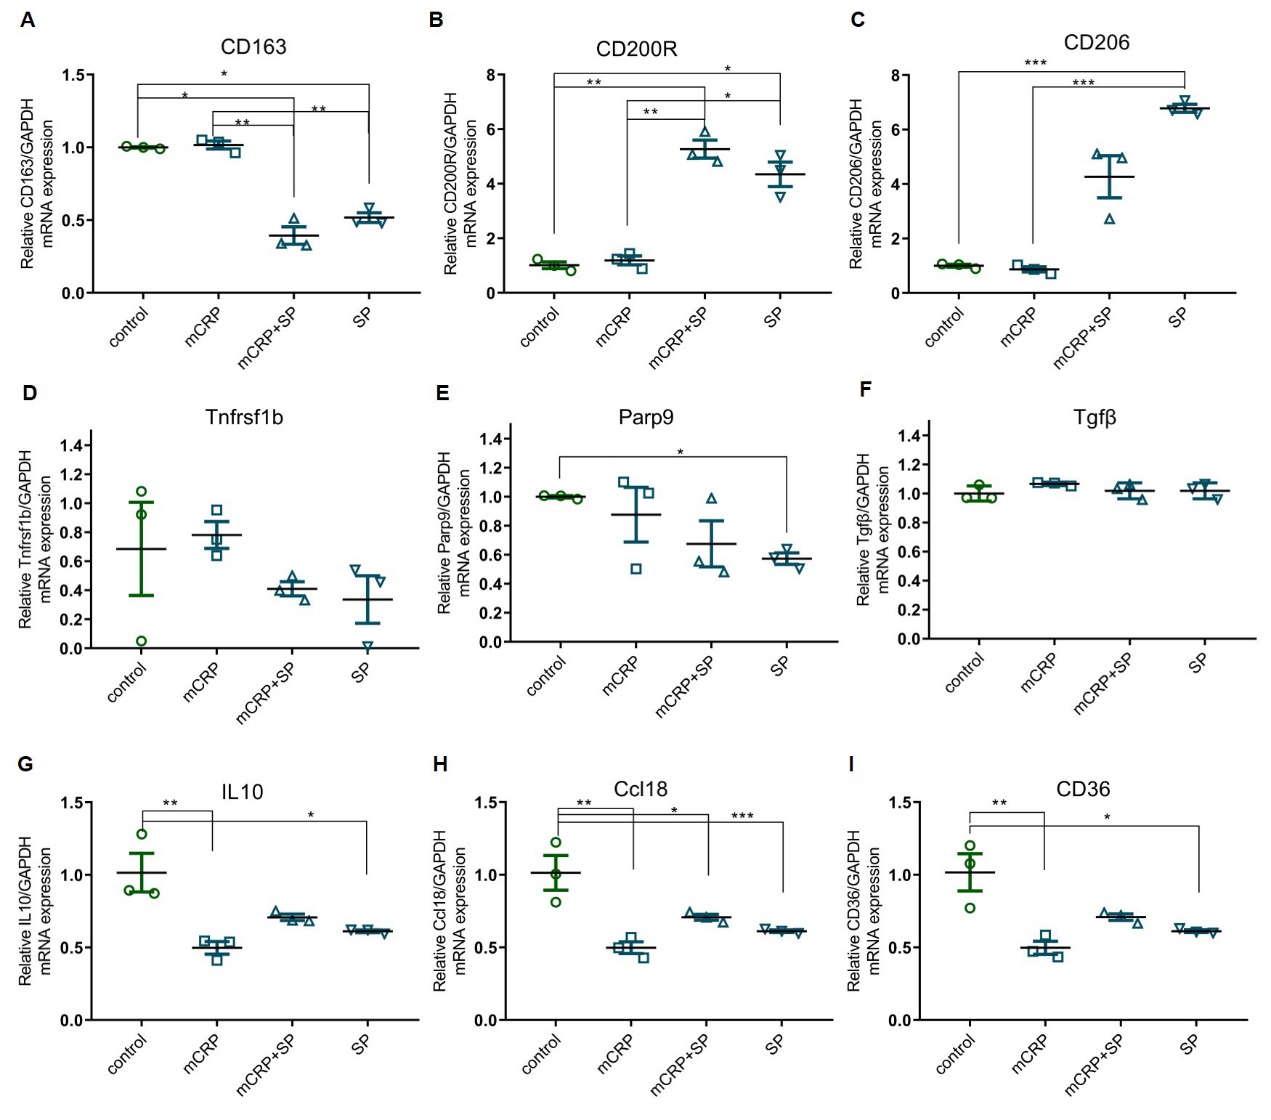


**Supplementary Figure 2** Effects of mCRP and the JNK inhibitor (SP600125) on the mRNA levels of the panel of anti-inflammatory biomarkers on macrophages measured by qRT-PCR. (**A**)CD163, (**B**)CD200R，(**C**)CD206, (**D**)Tnfrsf1b, (**E**)Parp9, (**F**)Tgfβ, (**G**)IL10, (**H**)Ccl18, (**I**)CD36 THP-1 cells were induced by PMA with mCRP (50μg/ml) for 8 h and/or co-cultured with the JNK inhibitor (SP600125, 10μM). Data are represented as mean ± SD, **p*<0.05; ***p*<0.01; ****p*<0.001


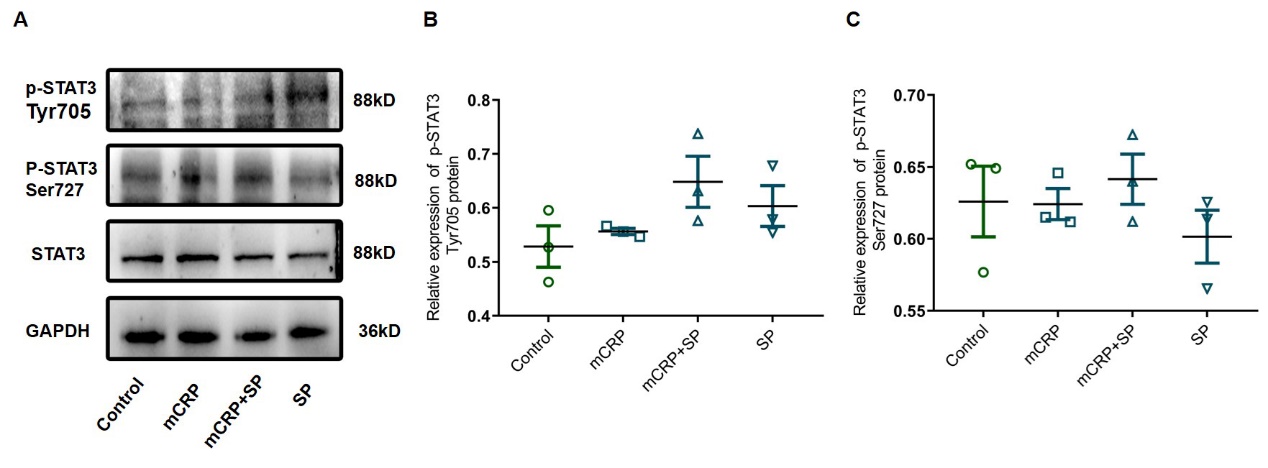


**Supplementary Figure 3** Effects of mCRP and the JNK inhibitor, SP600125 on the protein levels of STAT3 signaling pathway. (**A**) Representative images of p-STAT3 at Tyr705 and Ser727 sites in THP-1 cells incubated with mCRP (50μg/ml) and/or JNK inhibitor (SP600125, 10μM) for 8 h. (**B**) Quantitative analysis of p-JNK at Tyr705 site in cultured THP-1 cells. (**C**) Quantitative analysis of p-JNK at Ser727 site in cultured THP-1 cells. Data are represented as mean ± SD. There is no statistical difference between any two groups.
